# Supplementary material for: Mechanisms ofnorthern NorthAtlantic biomass variability
Source: Copernicus journal article supplement (doi:10.5194/bg-2018-89), 2018-02-20

SUPPLEMENT  
**Mechanisms of northern North Atlantic biomass variability**  
 McKinley, Ritzer and Lovenduski

5 **Table S1: Correlations of phosphate limitation for small and large phytoplankton, silicate limitation for large phytoplankton, and light limitation to for small biomass in each of the three regions.** Just as phosphate limitation for small and large phytoplankton are perfectly correlated in all cases, light limitation for large biomass is perfectly correlated with light limitation for small biomass, and thus is not shown for conciseness. Bold indicates statistical significance ( $p < 0.05$ ).

|                                |               | phosphate<br>limitation, small<br>phytoplankton | phosphate<br>limitation, large<br>phytoplankton | silicate limitation,<br>large<br>phytoplankton | light limitation,<br>small<br>phytoplankton |
|--------------------------------|---------------|-------------------------------------------------|-------------------------------------------------|------------------------------------------------|---------------------------------------------|
| <b>SOUTHEAST</b>               | large biomass |                                                 |                                                 |                                                |                                             |
| small biomass                  | <b>0.52</b>   | <b>0.68</b>                                     | <b>0.67</b>                                     | <b>0.42</b>                                    | <b>-0.75</b>                                |
| large biomass                  | -             | <b>0.74</b>                                     | <b>0.75</b>                                     | 0.04                                           | <b>-0.57</b>                                |
| phosphate<br>limitation, small |               | -                                               | <b>1.00</b>                                     | <b>0.34</b>                                    | <b>-0.87</b>                                |
| phosphate<br>limitation, large |               |                                                 | -                                               | <b>0.35</b>                                    | <b>-0.86</b>                                |
| silicate limitation,<br>large  |               |                                                 |                                                 | -                                              | <b>-0.45</b>                                |
| <b>NORTHEAST</b>               | large biomass |                                                 |                                                 |                                                |                                             |
| small biomass                  | <b>0.36</b>   | -0.09                                           | -0.12                                           | -0.13                                          | -0.08                                       |
| large biomass                  | -             | <b>0.31</b>                                     | <b>0.28</b>                                     | 0.05                                           | -0.17                                       |
| phosphate<br>limitation, small |               | -                                               | <b>1.00</b>                                     | <b>0.88</b>                                    | <b>-0.87</b>                                |
| phosphate<br>limitation, large |               |                                                 | -                                               | <b>0.91</b>                                    | <b>-0.86</b>                                |
| silicate limitation,<br>large  |               |                                                 |                                                 | -                                              | <b>-0.80</b>                                |
| <b>NORTHWEST</b>               | large biomass |                                                 |                                                 |                                                |                                             |
| small biomass                  | <b>-0.34</b>  | <b>-0.50</b>                                    | <b>-0.52</b>                                    | <b>-0.57</b>                                   | <b>0.61</b>                                 |
| large biomass                  | -             | <b>0.83</b>                                     | <b>0.83</b>                                     | <b>0.60</b>                                    | <b>-0.63</b>                                |
| phosphate<br>limitation, small |               | -                                               | <b>1.00</b>                                     | <b>0.81</b>                                    | <b>-0.71</b>                                |
| phosphate<br>limitation, large |               |                                                 | -                                               | <b>0.83</b>                                    | <b>-0.73</b>                                |
| silicate limitation,<br>large  |               |                                                 |                                                 | -                                              | <b>-0.85</b>                                |

**Figure S1: Monthly surface ocean biomass** for SeaWiFS (1998-2007, red), MODIS (2003-2015, blue) and model (1998-2009, 0-100m, black) (a) SE region, (b) NE region, and (c) NW region.

15 **Figure S2: Terms for limitation** by (a) phosphate, small phytoplankton (b) Light, large phytoplankton, (c) silicate, large phytoplankton, (d) 1998-2007 trend in phosphate limitation, small phytoplankton, (e) 1998-2007 trend in light limitation, large phytoplankton, and (f) 1998-2007 trend in silicate limitation, large phytoplankton. All are unitless. In d, e and f, significant trends are marked with a black contour and the three focus regions are outlined in red.

Figure S1

**Biomass ( $\text{mgC m}^{-3}$ )**

**(a) Southeast**

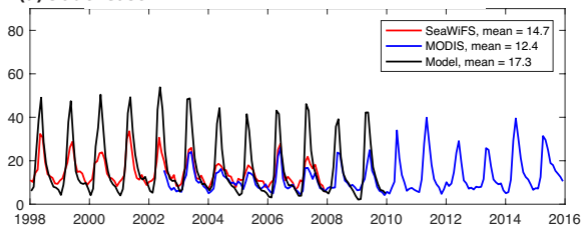

**(b) Northeast**

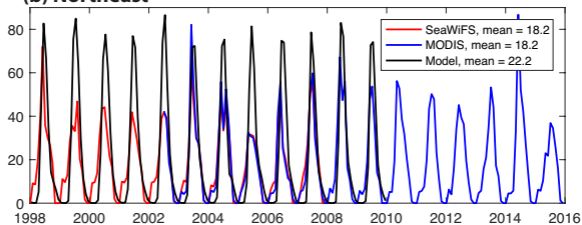

**(c) Northwest**

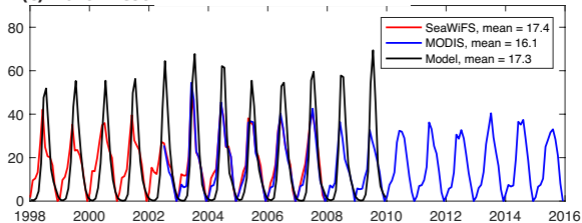

Figure S2

**(a) Phosphate Limitation, Small Phytoplankton  
1998-2007 Mean**

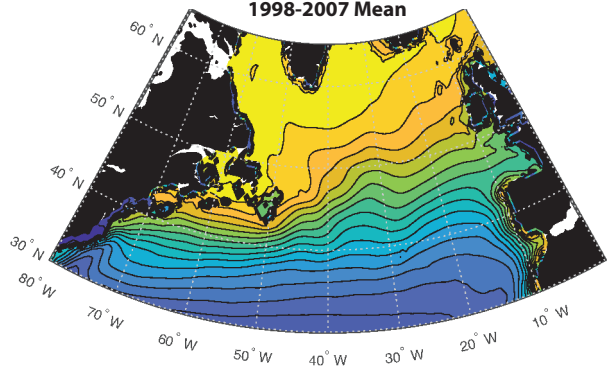

**(d) Phosphate Limitation, Small Phytoplankton  
1998-2007 Trend**

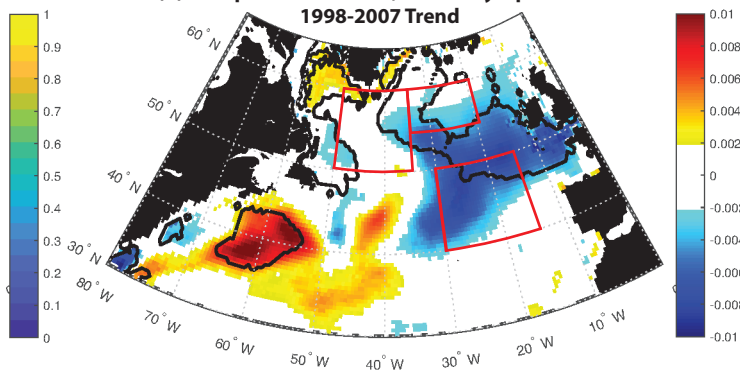

**(b) Light Limitation, Large Phytoplankton  
1998-2007 Mean**

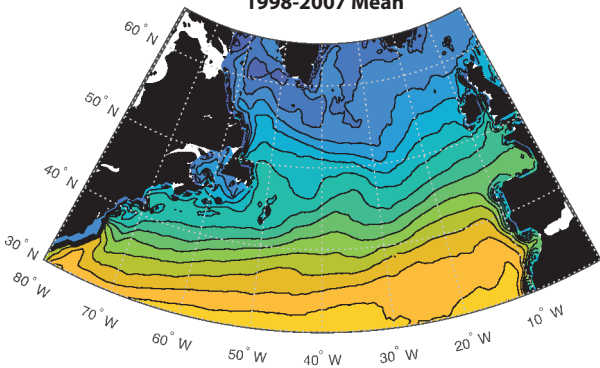

**(e) Light Limitation, Large Phytoplankton  
1998-2007 Trend**

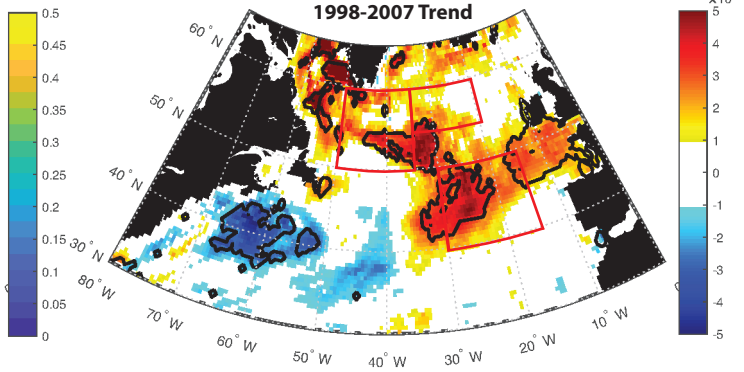

**(c) Silicate Limitation, Large Phytoplankton  
1998-2007 Mean**

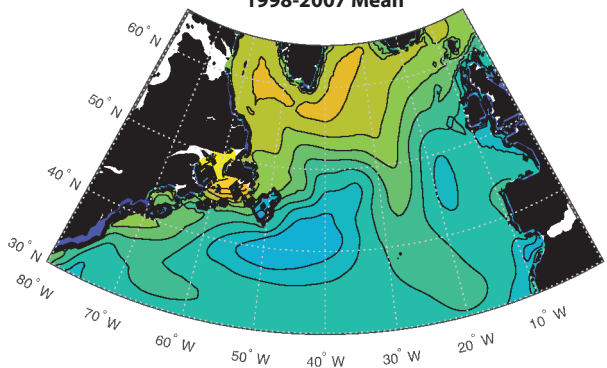

**(f) Silicate Limitation, Large Phytoplankton  
1998-2007 Trend**

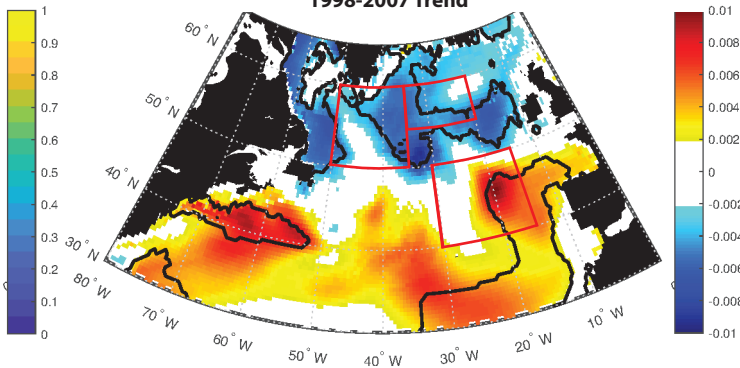

Supplement: Supplementary file 1 [file bg-2018-89-supplement.pdf]
